# Supplementary material for: Secondary Organic Aerosols Derived from Intermediate Volatility n-Alkanes Adopt Low Viscous Phase State
Source: Copernicus journal article supplement (doi:10.5194/egusphere-2024-51), 2024-01-18
Supplement: Supplementary file [file egusphere-2024-51-AC2-supplement.pdf]

## Response to Referee 2

### GENERAL COMMENTS:

In this study, the authors predict the viscosity of n-alkane SOA under high NO<sub>x</sub> conditions using a box model (GECKO-A) combined two different T<sub>g</sub>-predictors: the compositional parameterization (CP) and a machine-learning based approach (tgBoost). This paper is within the scope of ACP, and the results are relevant and useful for the atmospheric chemistry community in terms of better understanding the various trends of SOA viscosity. This study provides a clear benchmark for future work to test the viscosity predictions of tgBoost and CP to further validate the author's conclusions. However, some parts of the paper need further explanation and I also suggest rewording some parts of the paper for clarity, as discussed below. Overall, this paper is acceptable for publication in ACP after revision of the below points.

We thank Referee 2 for the review and positive evaluation of our manuscript.

### SPECIFIC COMMENTS:

The authors point to previous studies that describe in detail the limitations and assumptions of using tgBoost and CP. This is normal practice in general, but it would strengthen the paper to add a brief summary of the main limitations and assumptions of each model here. The authors do mention the types of reactions that tgBoost does not explicitly consider, but nothing about other assumptions made for tgBoost or for combining GECKO-A with CP. A short discussion will add some needed context for the readers.

The difference between CP and tgBoost is consideration of molecular structure and functional group, as described in the manuscript. Box model simulations with CP and tgBoost were conducted with same conditions. For both model simulations with CP and tgBoost, the particle number concentration is assumed to remain constant (coagulation is not treated), while the particle radius evolves following the partitioning of organics. Potential concentration gradients in the particle phase are not resolved and SOA particles are assumed to be homogeneously well-mixed implicitly. Beyond these points, we do not have other assumptions for combining GECKO-A with tgBoost or CP. We have clarified these assumptions in the revised manuscript.

More details need to be provided for the calculation of viscosity and bulk diffusivity from T<sub>g,org</sub>. What parameters were used in the VFT equation to calculate viscosity (e.g., what was D<sub>f</sub>?). What parameters were used in the fractional Stokes-Einstein equation to calculate bulk diffusivity (e.g., what hydrodynamic radii was used for the n-alkane SOA)? Please at least provide the parameters for this calculation. This could either go in the main text or supplement.

The fragility parameter ( $D_f$ ) was assumed to be 10 based on DeRieux et al. (2018). An effective molecular radius was assumed to be 0.5 nm and a fractional SE parameter of 0.93 was used based on Evoy et al. (2019). We clarify these values in the revised manuscript.

In many cases, the authors describe their results as “counter-intuitive”, “surprising”, and “remarkable”. I don't necessarily think these kinds of superlatives are appropriate in this case. From what I can tell, the authors describe three things as “remarkable”: 1) that tgBoost and CP don't agree on the viscosity trend (e.g. Line 259, 272), 2) that the viscosity of n-alkanes decrease

with increasing  $n$  (Line 275), and 3) that tgBoost predicts the viscosity very well (Line 449). For points (1) and (3), the authors themselves state on Lines 352-355 that “as tgBoost considers molecular structure.... It should make better predictions for multi-functionalized compounds,” which I agree with – tgBoost seems like a more sophisticated model, so I think it’s reasonable that it would both perform better than CP and perform quite well when comparing to measurements. For point (2), I believe it’s relatively well-hypothesized that SOA viscosity is not only dependent on molecular weight, but also functionality and structure. I suggest either revising or removing this type of language throughout.

As discussed in the manuscript and summarized by this comment, the results on lower viscosity from larger alkane precursors are counter-intuitive given that the molar mass has primary importance on determining  $T_g$ . In this sense, we were surprised by our results, but better performance by tgBoost should not be surprising. Hence, we remove the word “surprising” throughout the revised manuscript and removed “counter-intuitively” from abstract to tone down.

The authors mention studies where CP viscosity predictions have agreed with viscosity measurements (Line 378-380), but if I recall the literature correctly, there have been previous studies where CP (i.e., the DeRieux et al., 2018 parameterization) has not agreed with experimental viscosities. Mentioning some of these cases would strengthen the conclusion that GECKO-A + tgBoost is a better tool for predicting SOA viscosity.

Thanks for this constructive comment. While CP successfully predicted viscosity for many types of SOA, it did not work well for modeling viscosity of indoor surface films (O’Brien et al., Environ. Sci.: Processes Impacts, 23, 559, 2021). They were mostly formed by deposition of cooking aerosols, which contain substantial amounts of high molar mass unsaturated compounds such as triglycerides and their derivatives with carbonyl and ester groups. CP significantly overestimated the measured viscosity of the films, showing limitations of viscosity predictions without considering molecular structure and functional groups. We have added the following texts in introduction:

“A method was developed to predict SOA viscosity from the  $T_g$ -scaled Arrhenius plot of fragility by considering Gordon-Taylor mixing rule and hygroscopic growth of SOA particles (DeRieux et al., 2018; Shiraiwa et al., 2017). The  $T_g$  compositional parameterizations (CP) and the viscosity prediction method have been applied to high resolution mass spectrometry data of various types of SOA including toluene SOA (DeRieux et al., 2018), SOA generated by diesel fuels (Song et al., 2019),  $\beta$ -Caryophyllene SOA (Maclean et al., 2021), and SOA generated by surrogate VOC mixtures by healthy and stressed plants (Smith et al., 2021), agreeing well with viscosity measurements. However, CP substantially overestimated viscosity measurements of indoor surface films which are mostly composed of unsaturated high molar mass compounds such as triglycerides (O'Brien et al., 2021). CP does not consider molecular structure nor functionality explicitly, representing a limitation of this method.”

Lines 323-327. The authors note that the trend of N:C and O:C is consistent with previous studies, which seems correct. However, they also mention that the simulated values are 15-45% lower than these measured values. A short discussion of why these values are lower is warranted.

The discrepancies are likely due to errors on modeling gas-wall partitioning and gas-particle partitioning. In addition, the difference may be caused by missing processes in the model such as reactive uptake of oxidants and particle-phase chemistry. We have included this point in the revised manuscript. Comparisons of the simulated chemical composition to the measured data of individual compounds in the gas and in the condensed phase is needed for the series of n-alkane in order to better understand and constrain the influence of gas phase chemistry, gas-wall partitioning, gas-particle transfer, and particle reactivity on the O:C and N:C ratios, which is beyond the scope of this study but should be a subject of future studies.

The mass loadings of seed particles in the chamber were ~200-400 ug/m<sup>3</sup>, but I don't see anywhere that states the mass loadings of SOA in the chamber. Is it assumed that the SOA mass loading is equal to the seed particles mass loading?

The final SOA mass concentrations were in the range of ~300 – 6000 µg m<sup>-3</sup> depending on precursors (Lim & Ziemann, 2009). We clarify this information in the revised manuscript.

Lines 243-245: the authors mention that particle-phase chemistry was shown to be substantial in n-alkane SOA formation for low NO<sub>x</sub> conditions. If I understood correctly, GECKO-A models gas-phase chemistry only, and not particle-phase chemistry. The authors do not further discuss the possibility of particle-phase chemistry under high NO<sub>x</sub> conditions and how this may affect their results.

Recently, Ranney et al. (2023) suggested that cyclic hemiacetals form acetal dimers in the particle phase for SOA formed from the reaction of n-hexadecane SOA and OH/NO<sub>x</sub>. While they could not directly detect dimers, their derivatization measurements indicate the presence of acetal dimers. In the revised manuscript, we have toned down our statement to mention that oligomerization chemistry is not a dominant process and then mention these latest results by Ranney et al. (2023). We also note that the impact of such particle-phase chemistry may warrant further investigations by future model development and experimental studies.

#### **TECHNICAL NOTES:**

Line 76: Long-chain not defined. What value of n differentiates long-chain from medium-chain?

We are not aware of a clear definition to separate medium- and long-chain alkanes, but C8-17 have been called long-chain alkanes in previous studies.

Line 92: move “to date” later in the sentence – “The GECKO-A model is one of the most comprehensive generators of gas-phase chemical schemes to date...”

Line 107: add “the” before “oxidation”.

Line 152: Should be Fig. A3a, not S3a.

Line 164: Add a comma after “In this study”

Line 165: Make “prediction” plural.

Line 194: I could be wrong, but doesn't Tenax need a registered (R) symbol following it? “Tenax®”.

Line 231: “lower volatility” not “volatility lower.”

Line 247: Add "an" before “effective mass accommodation”.

Line 247: Change “that” to “which”.

Line 251: Glass transition temperature was already defined, so the symbol  $T_g$  can be used here.

Line 252: Text suggests to look at the "green line," but no figure has been mentioned for a while.

Please indicate which figure/panel.

Line 340-341 – Add "that the" before “five species”.

Line 366: Add "the" before SOA.

Line 431: Reword the start of the sentence. Either “IVOCs have gained..” or “IVOCS are gaining attention..”

Thanks for carefully reading the manuscript. We have revised them as suggested.

Figure 1 – The ordering of panels is not intuitive with (d) being the top right panel.

Figure 1c - The orange line is essentially not visible behind the green line. Make some note of this in the caption or text, or visually show it some other way.

Figure 2 - The text of secondary y-axis on panel (a) and the y-axis of panel (b) are too close together.

We have revised two figures as suggested.
